# Supplementary material
Source: publisher site journal article supplement (https://www.dovepress.com/article/209253)

(a)

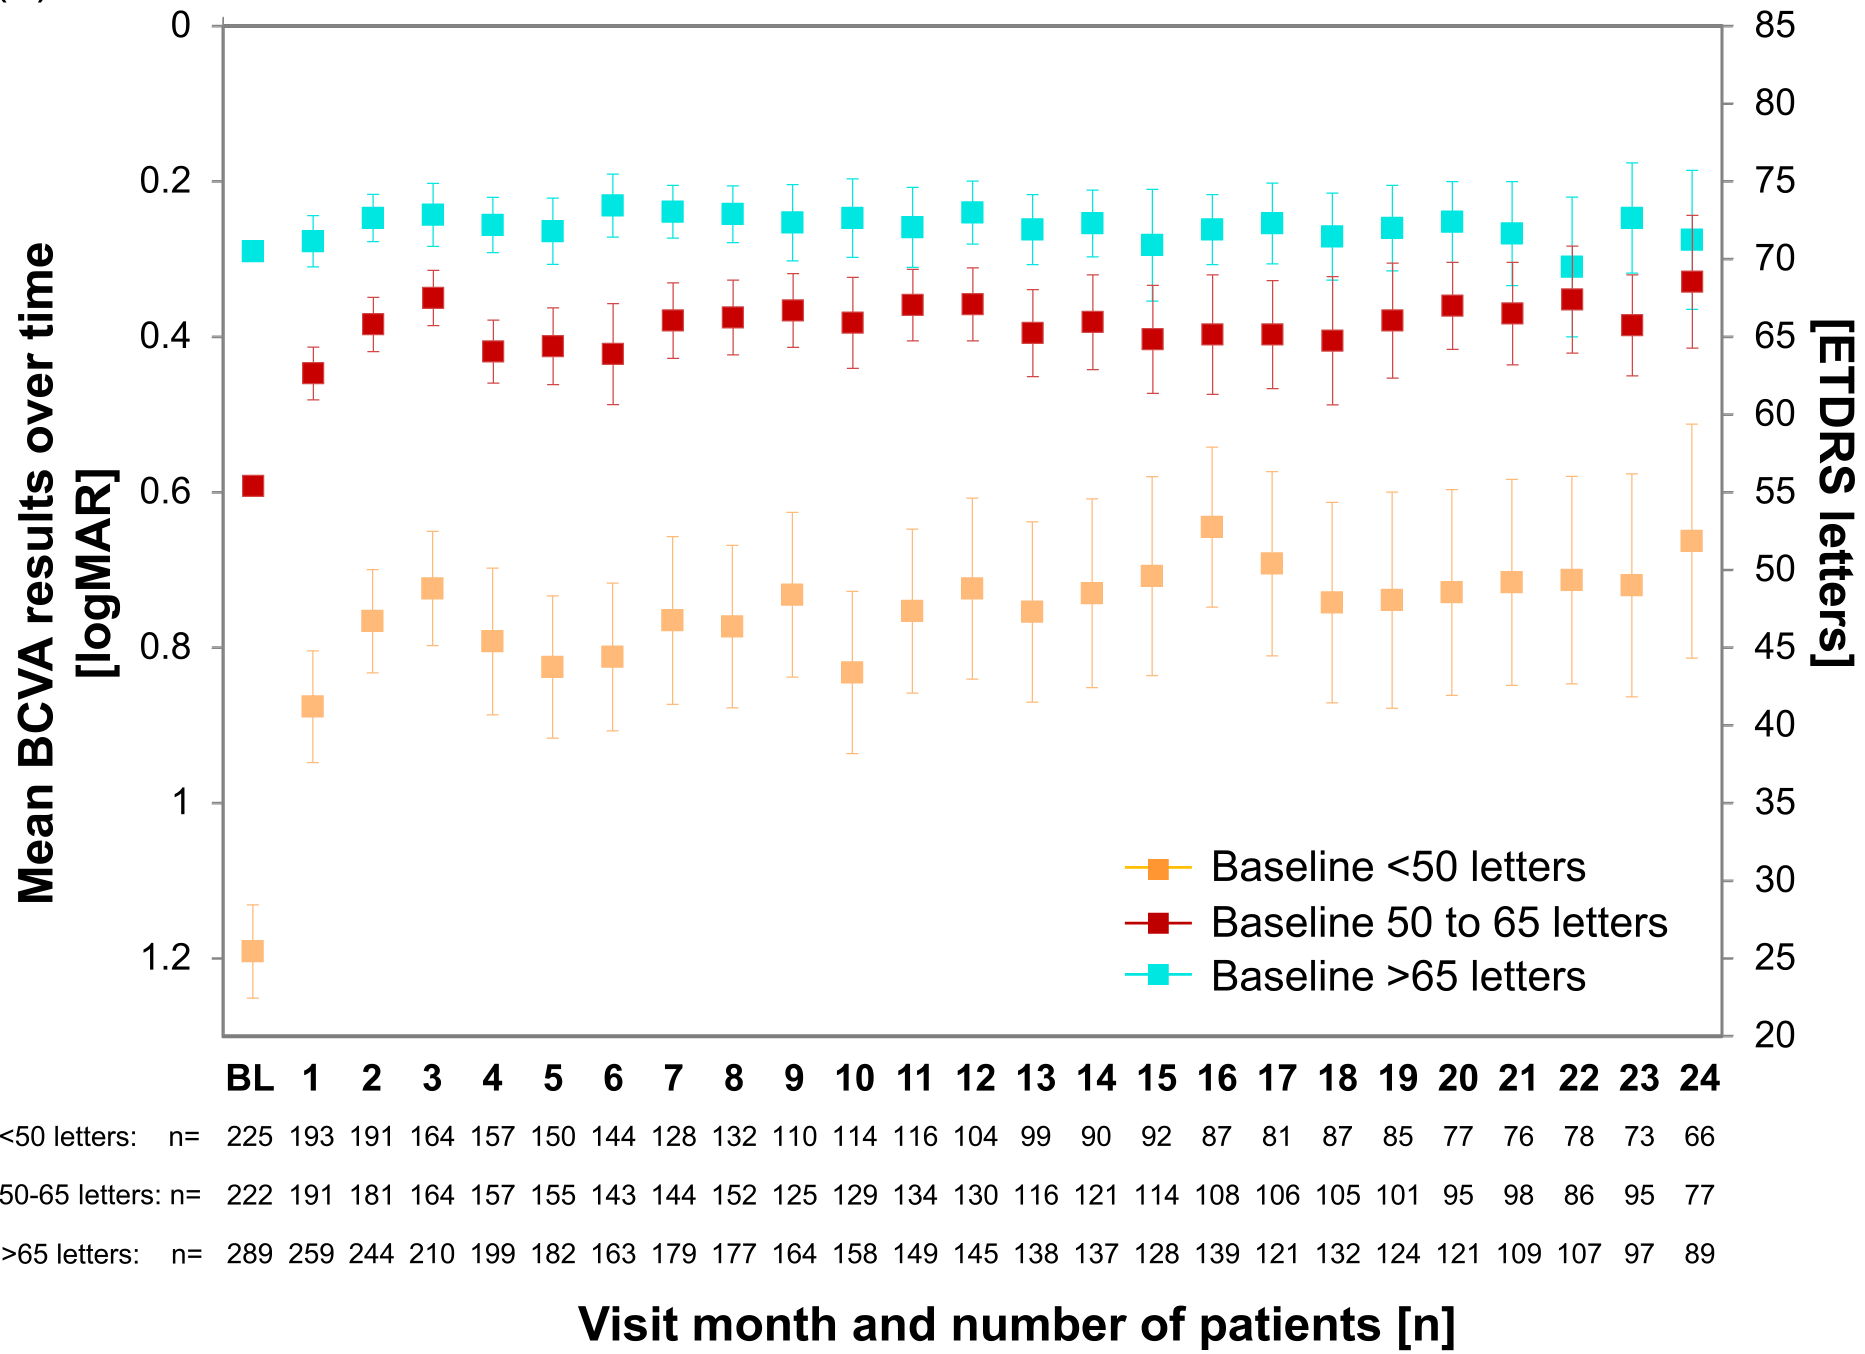

(b)

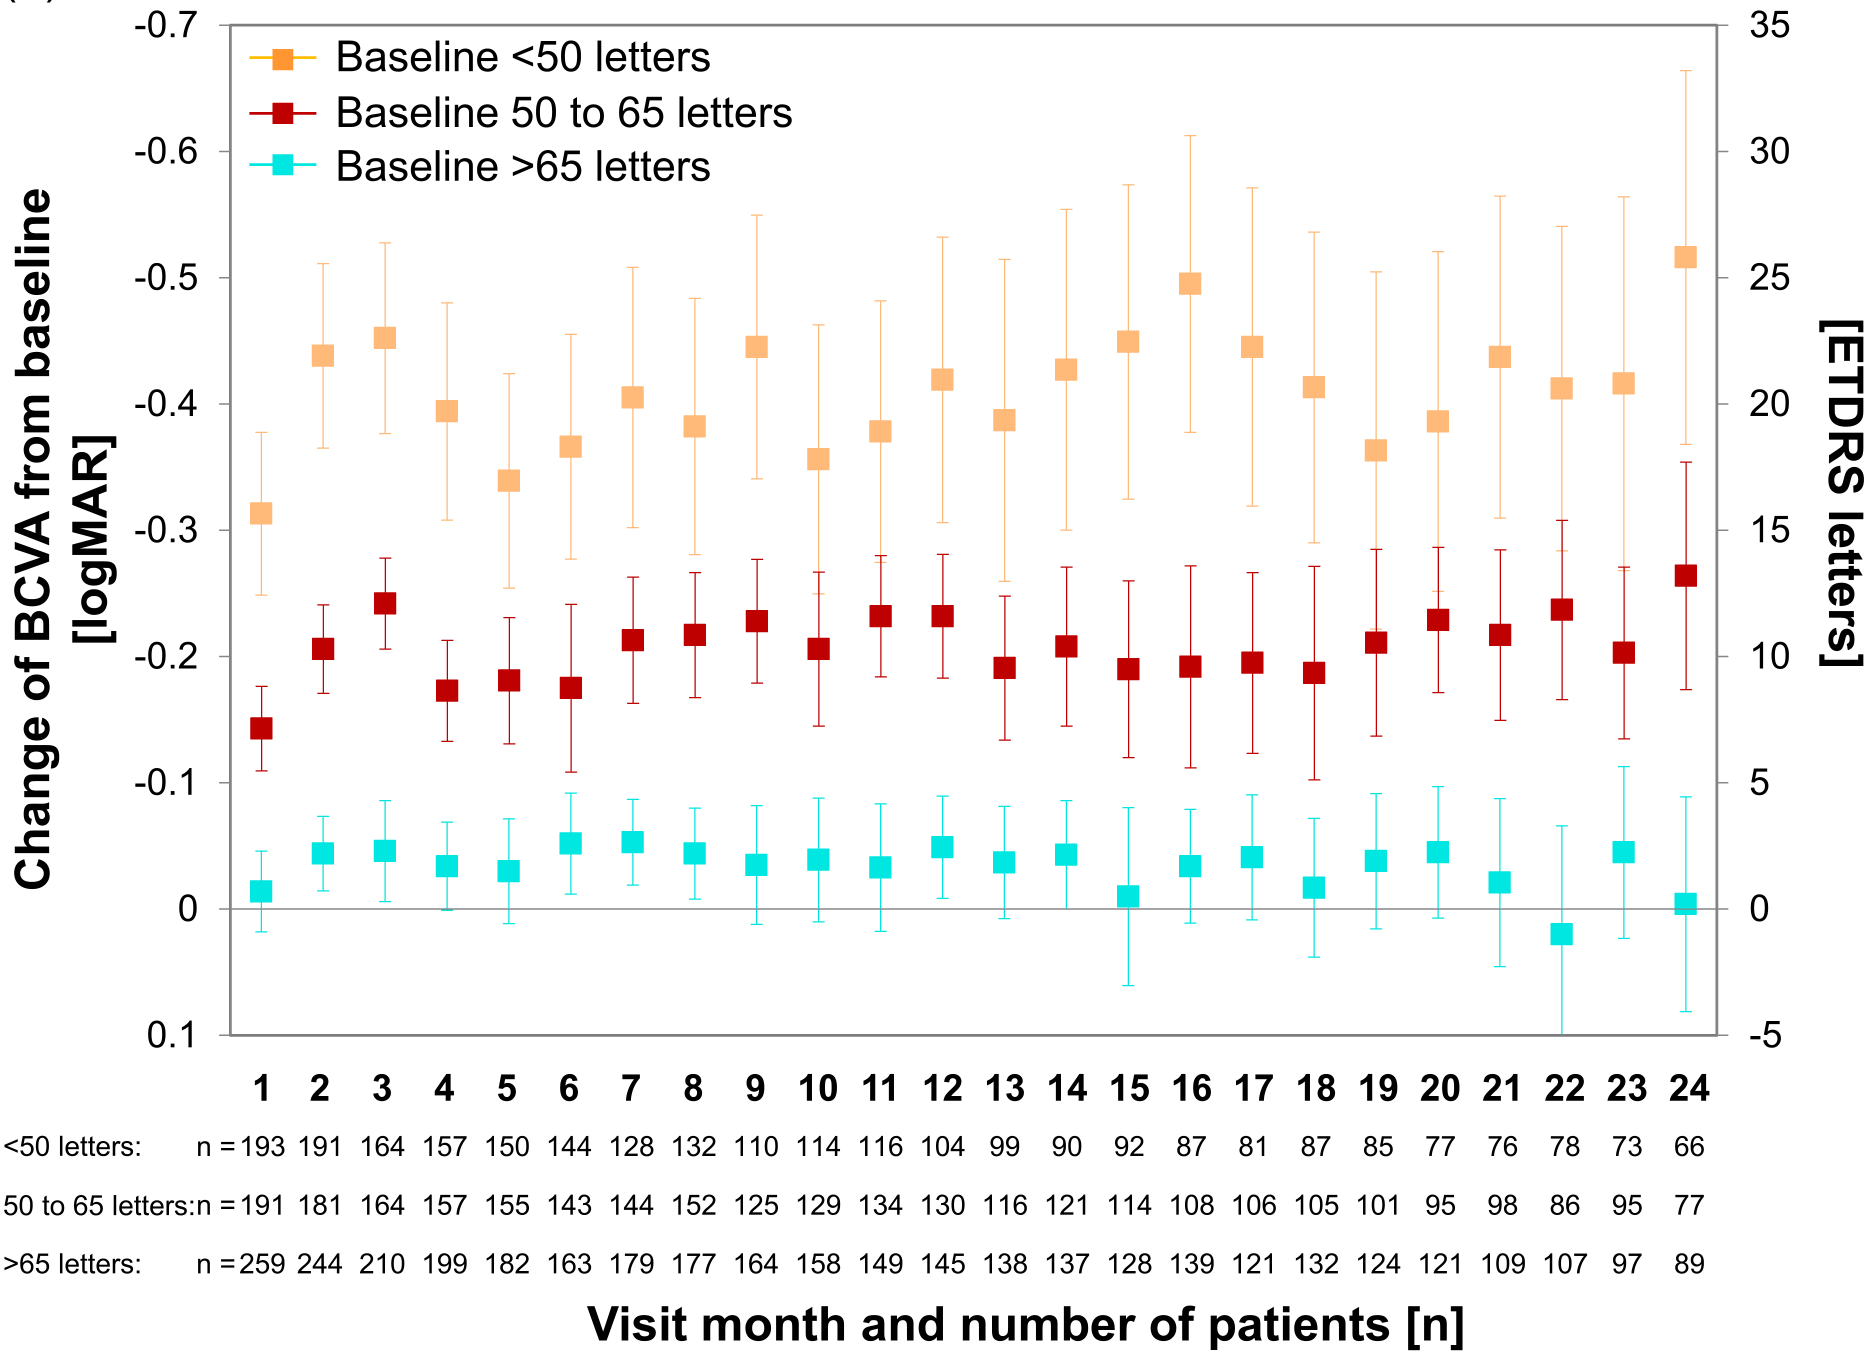

(a)

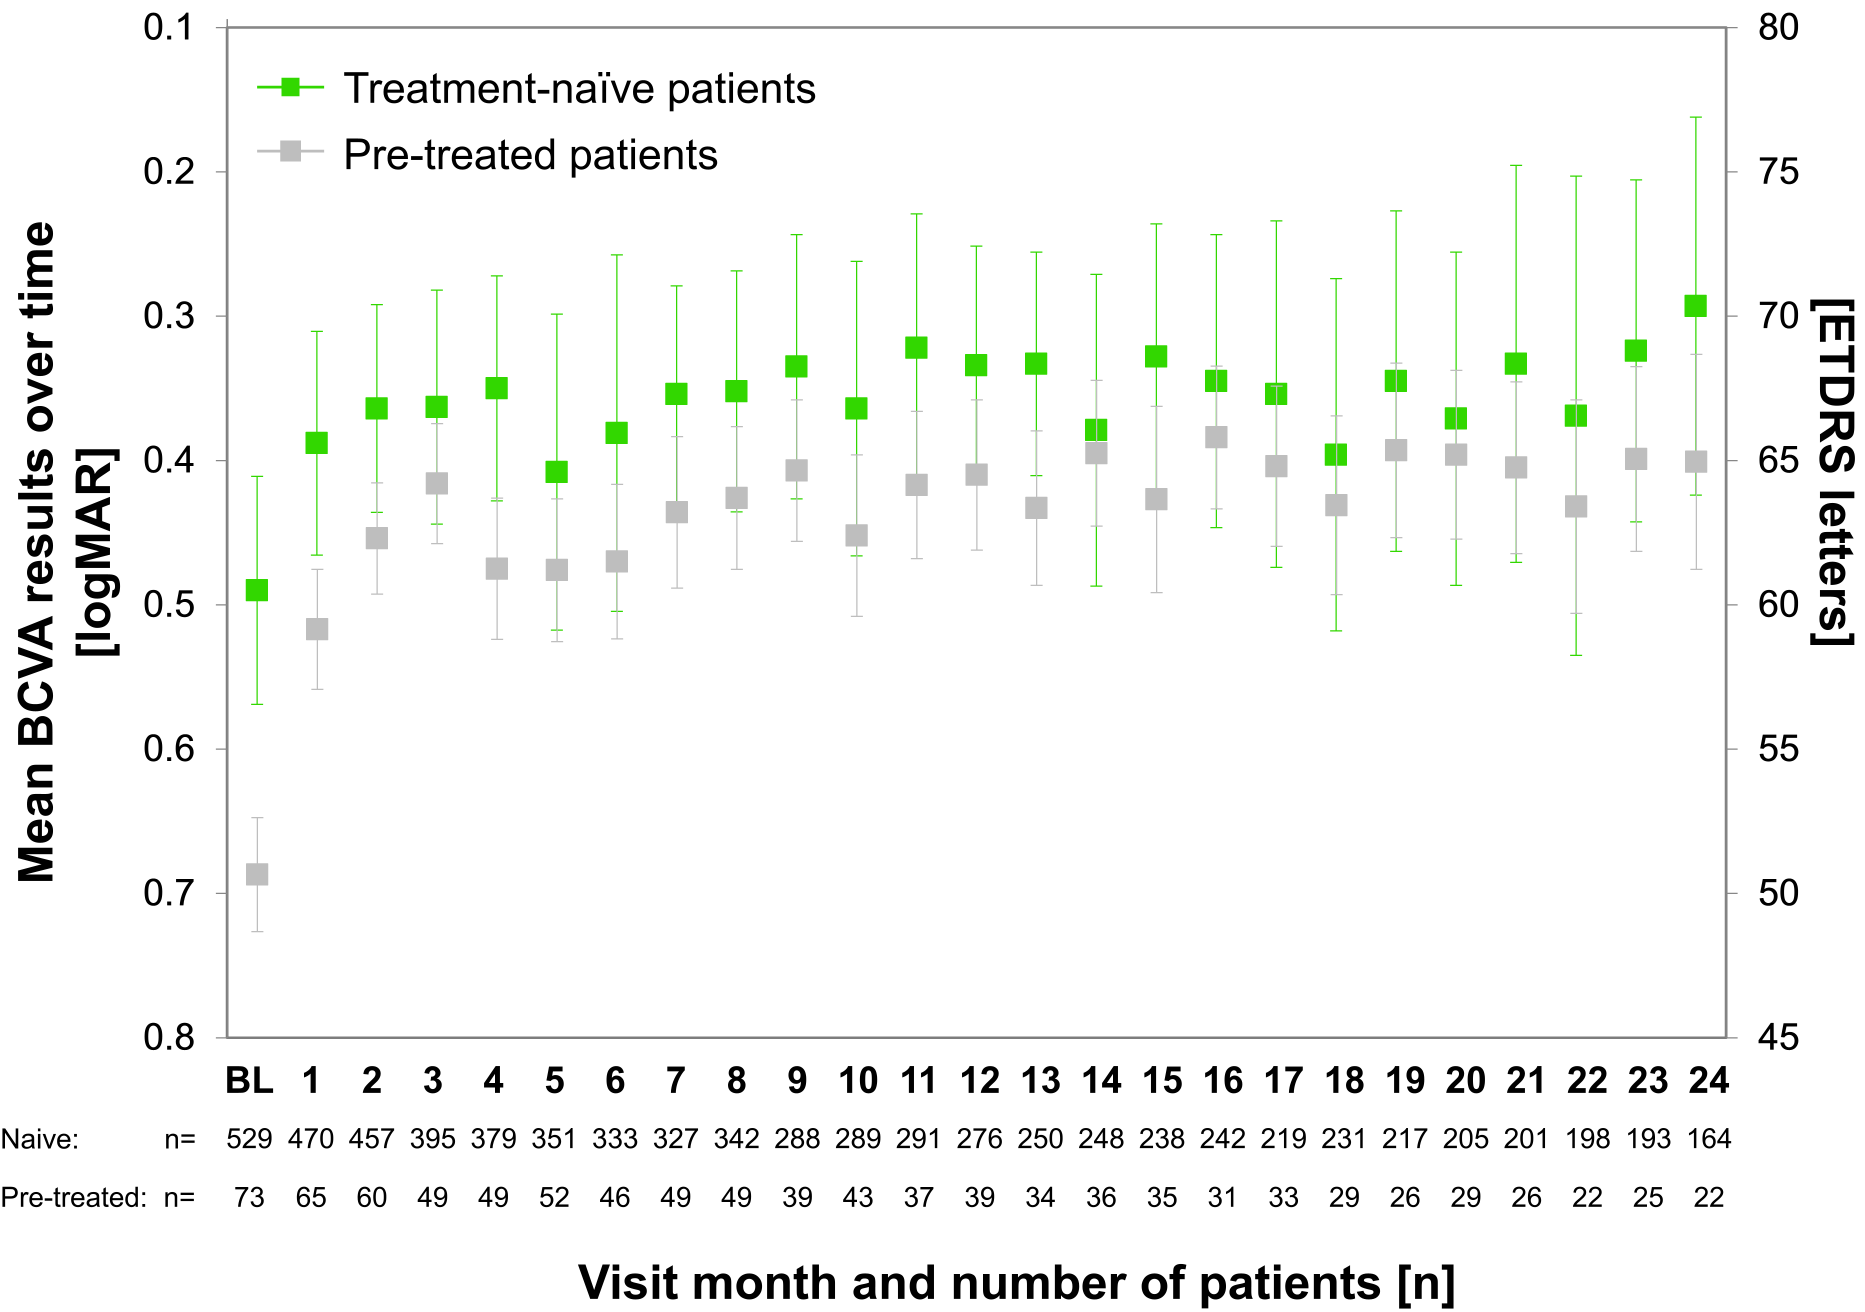

(b)

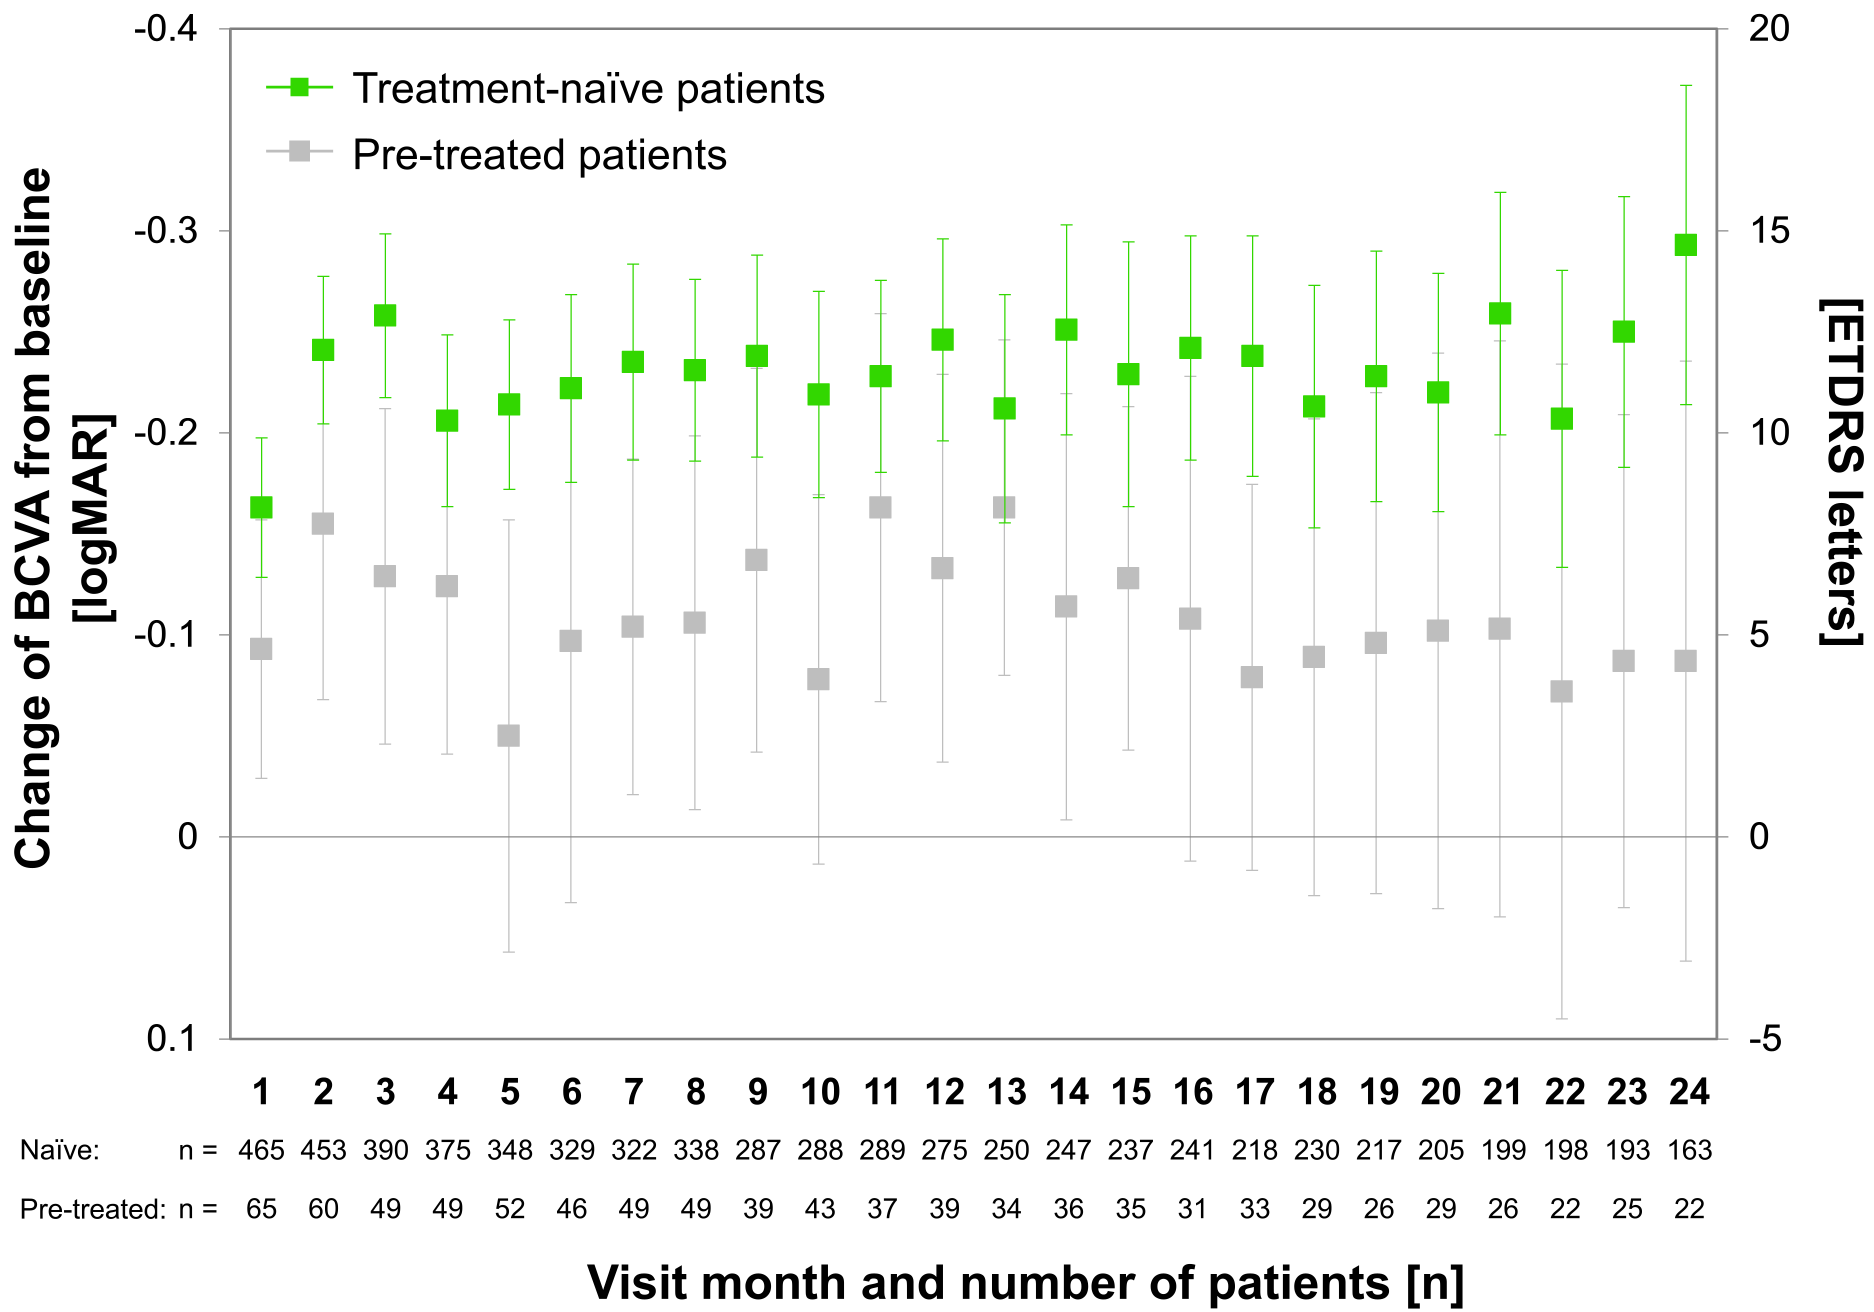

Supplement: Supplementary file 1 [file get_supplementary_file.php]
